# Supplementary material for: Sex-dependent additive effects of dorzagliatin and incretin on insulin secretion in a novel mouse model of GCK-MODY
Source: PubMed Central journal article supplement — bioRxiv. 2024 Nov 11:2024.11.09.622781. Preprint. [Version 1] doi: 10.1101/2024.11.09.622781 (PMC11601264; doi:10.1101/2024.11.09.622781), 2024-11-11
Supplement: media-3.pdf [file media-3.pdf]

Supplementary Table 2. Renal Histology. See Text and Supp Fig. 4

| Sex    | Genotype | Observations                                                                                       |                                       |
|--------|----------|----------------------------------------------------------------------------------------------------|---------------------------------------|
|        |          | Tubular compartment                                                                                | Glomerular compartment                |
| Male   | WT       | Mild tubular damage                                                                                | Absence of damage                     |
| Male   | WT       | Mild tubular damage and few vacuolized epithelial cells                                            | Absence of damage                     |
| Female | WT       | Absence of tubular damage                                                                          | Absence of damage                     |
| Female | WT       | Absence of tubular damage and rare chromatin margination                                           | Absence of damage                     |
| Female | WT       | Mild tubular damage and frequent vacuolization of epithelial cells                                 | Absence of damage                     |
| Female | WT       | Mild tubular damage                                                                                | Absence of damage                     |
| Female | WT       | Absence of tubular damage                                                                          | Absence of damage                     |
| Male   | Het      | Mild tubular damage, frequent chromatin margination and abundant vacuolization of epithelial cells | Presence of a periglomerular fibrosis |
| Male   | Het      | Moderate tubular damage                                                                            | Focal segmental glomerulosclerosis    |
| Male   | Het      | Mild tubular damage                                                                                | Absence of damage                     |
| Female | Het      | Mild tubular damage and few chromatin margination                                                  | Absence of damage                     |
| Female | Het      | Moderate tubular damage                                                                            | Absence of damage                     |
| Female | Het      | Mild tubular damage and slight vacuolization of epithelial cells                                   | Absence of damage                     |
| Male   | Homo     | Moderate tubular damage and vacuolization of epithelial cells                                      | Absence of damage                     |
| Male   | Homo     | Severe tubular damage with chromatin margination and isometric vacuolization of epithelial cells   | Absence of damage                     |
| Male   | Homo     | Moderate tubular damage and abundant chromatin margination                                         | Presence of a sclerotic glomerule     |
| Female | Homo     | Moderate to severe tubular damage and abundant chromatin margination                               | Absence of damage                     |
